# Supplementary material
Source: bioRxiv or medRxiv preprint supplement (https://medrxiv.org/highwire/filestream/81813/field_highwire_adjunct_files/0/2020.05.15.20103473-1.pdf)
Supplement: Supplementary file [file 2020.05.15.20103473-1.pdf]

**Extended Data Table 1** Characteristics of participants included in this study.

| Variables              | Training           |                   |                   |         | Validation          |                   |                   |         |
|------------------------|--------------------|-------------------|-------------------|---------|---------------------|-------------------|-------------------|---------|
|                        | COVID-19<br>(n=47) | healthy<br>(n=20) | CAP<br>(n=49)     | P value | COVID-19<br>(n=153) | healthy<br>(n=15) | CAP<br>(n=37)     | P value |
| Age~ Median [Min, Max] | 53.0 [31.0, 74.0]  | 29.0 [14.0, 50.0] | 37.0 [16.0, 76.0] | <0.001  | 64.0 [20.0, 89.0]   | 31.0 [19.0, 52.0] | 32.0 [20.0, 81.0] | <0.001  |
| <b>Gender</b>          |                    |                   |                   |         |                     |                   |                   |         |
| Female                 | 24 (51.1%)         | 7 (35.0%)         | 22 (44.9%)        | 0.477   | 81 (52.9%)          | 6 (40.0%)         | 23 (62.2%)        | 0.3274  |
| Male                   | 23 (48.9%)         | 13 (65.0%)        | 27 (55.1%)        |         | 72 (47.1%)          | 9 (60.0%)         | 14 (37.8%)        |         |

**Abbreviations:** COVID-19, Coronavirus Disease 2019; CAP, community acquired pneumonia.

**Extended Data Table 2** Significant dictionary elements positively correlated with COVID-19.

| Dictionary element | OR          | 95% CI      |           | P value     | FDR         |
|--------------------|-------------|-------------|-----------|-------------|-------------|
|                    |             | Lower       | Upper     |             |             |
| IB-3               | 7.71E+36    | 7.7352E+18  | 2.26E+57  | 0.00015289  | 0.000430108 |
| IB-61              | 3.25153E+18 | 359.9820936 | 2.60E+35  | 0.026274294 | 0.0431216   |
| IB-66              | 9.30E+46    | 3.97E+27    | 2.08E+69  | 8.61E-06    | 4.24E-05    |
| IB-88              | 1.37E+21    | 13586381.21 | 3.57E+36  | 0.004540289 | 0.008673985 |
| IB-132             | 4.12E+73    | 8.99E+44    | 1.32E+107 | 2.94E-06    | 1.79E-05    |
| IB-163             | 4.27E+151   | 6.10E+101   | 3.47E+214 | 1.08E-07    | 2.55E-06    |
| IB-166             | 3.09E+28    | 1.71393E+15 | 3.88E+43  | 7.19E-05    | 0.000224565 |
| IB-248             | 3.55897E+18 | 5413396.828 | 5.74E+31  | 0.003411235 | 0.006769584 |

Abbreviation: IB, Imaging biomarker; OR, Odds ratio; FDR, False discovery rate.

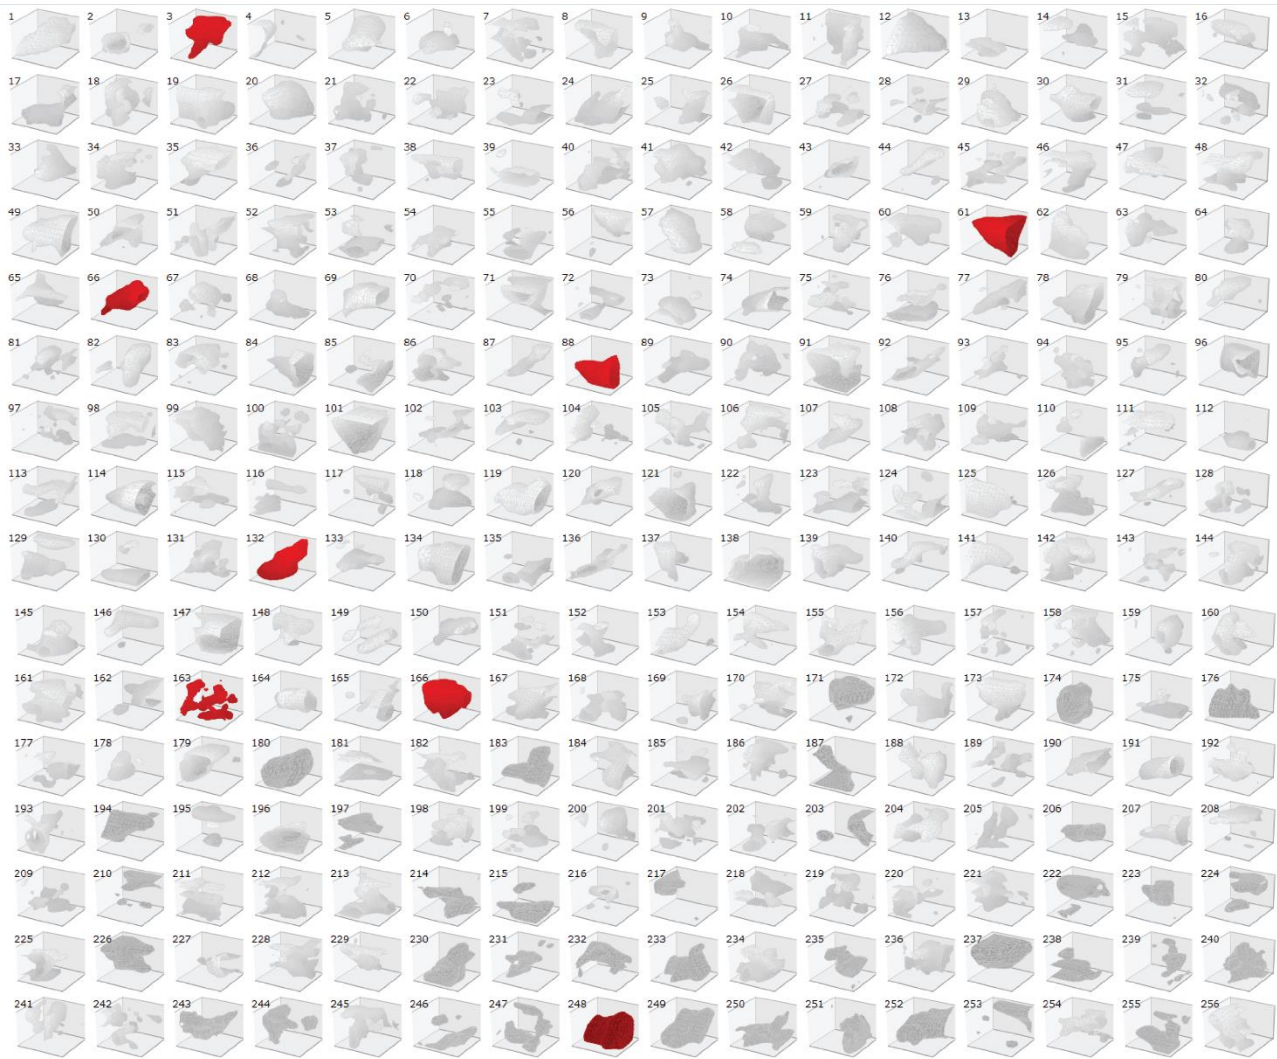

**Extended Data Fig. 1 Visualization of 256 dictionary elements (i.e., signal patterns) learned from training cohort, where 8 (in red) dictionary elements have significant positive correlation with COVID-19. These 8 dictionary elements, served as our imaging biomarkers, have also been demonstrated in Figure 1.**

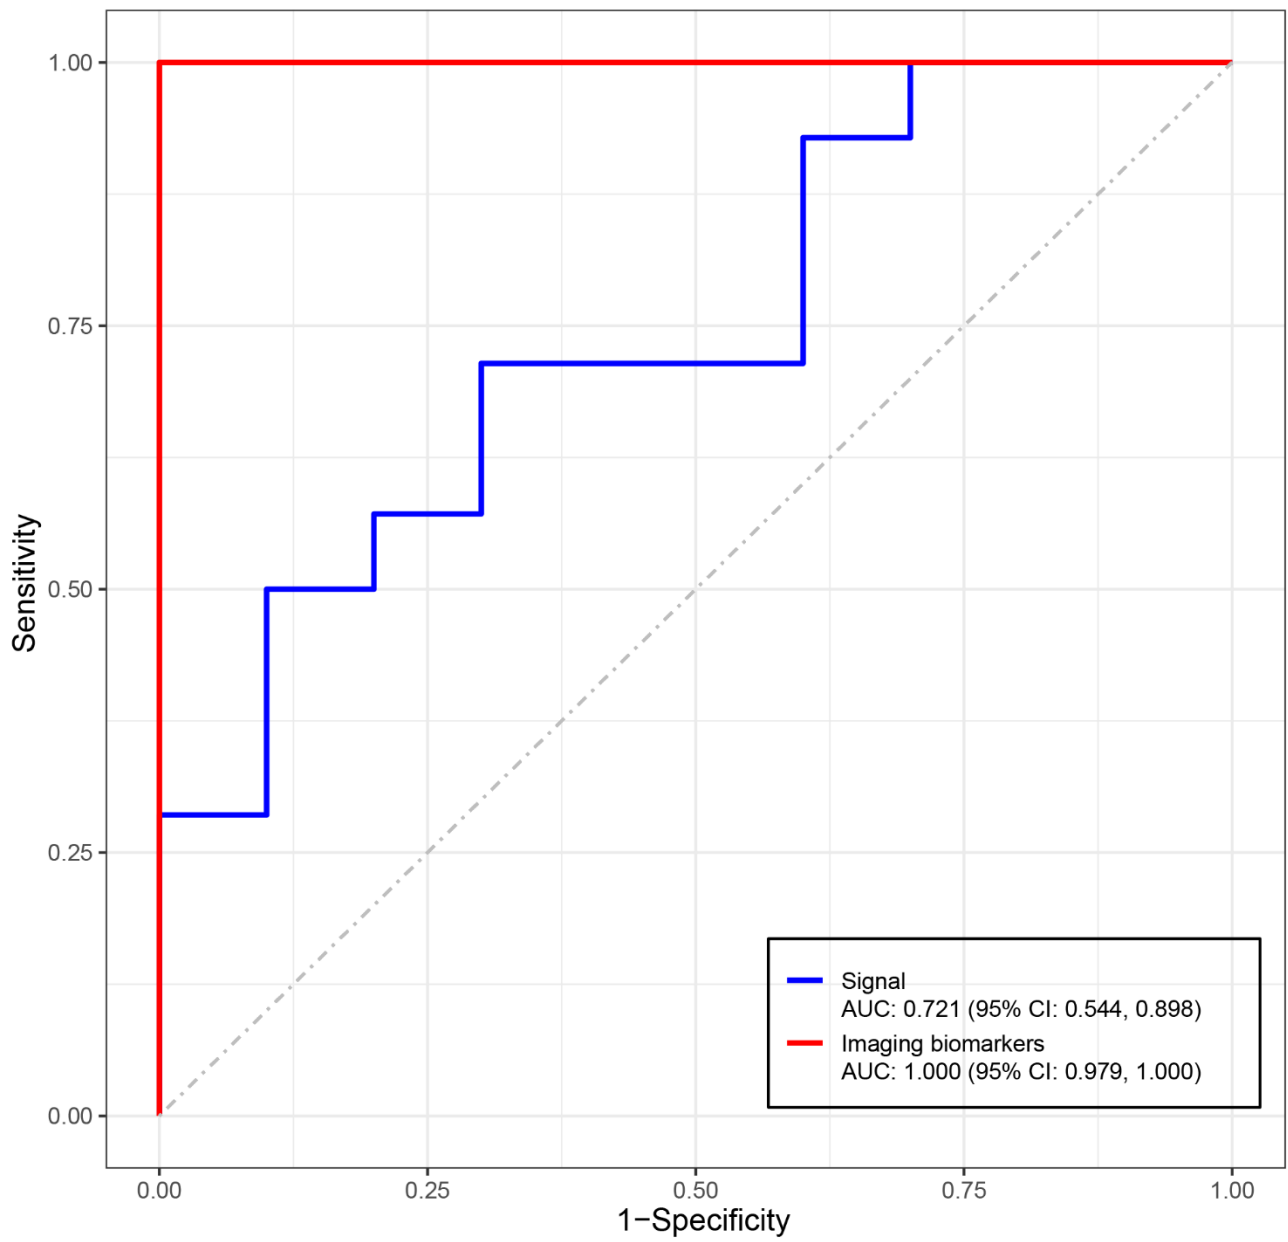

**Extended Data Fig. 2 COVID-19 screening performance of signal-based model (blue line) and imaging biomarker-based model (red line) on training cohort.**

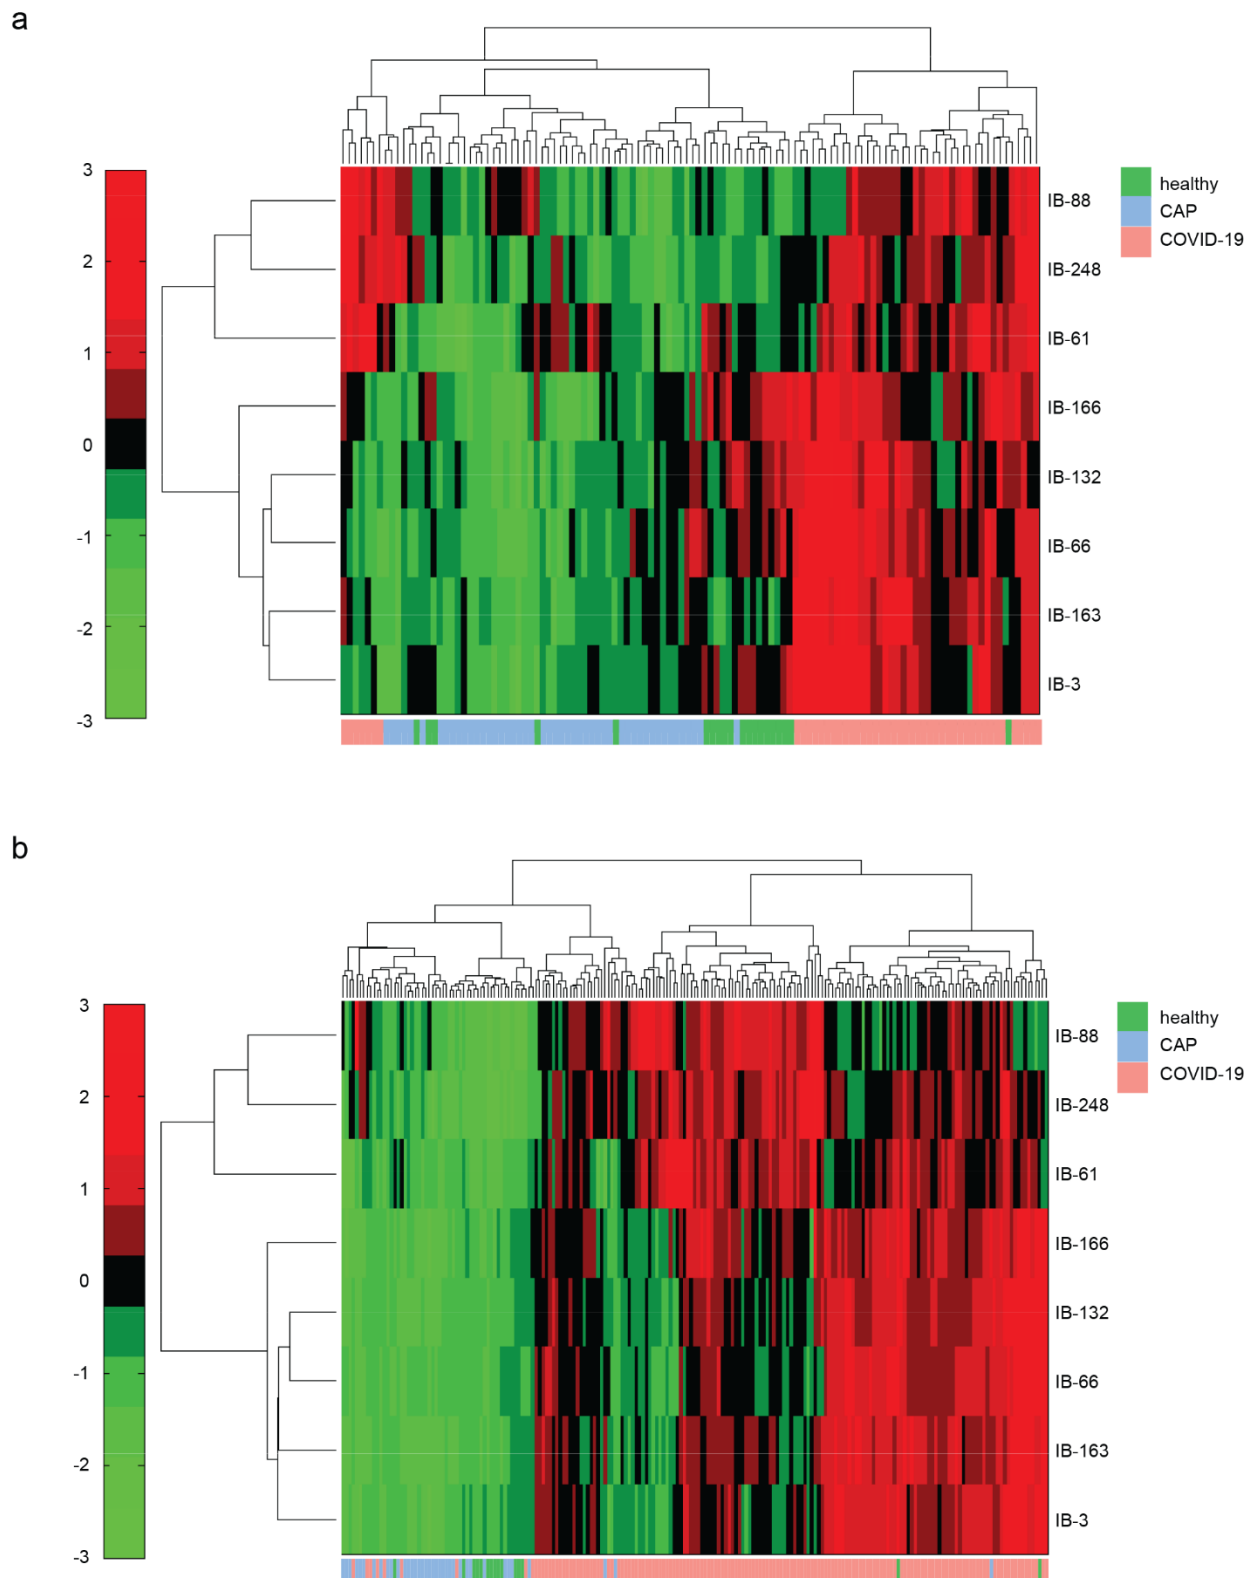

**Extended Data Fig. 3. The relationship between 8 imaging biomarkers and COVID-19. a-b.** Heatmap of relative abundance of 8 imaging biomarkers in both training (a) and validation (b) cohorts.
